# Supplementary material for: Highly Elastically Deformable Coiled CNT/Polymer Fibers for Wearable Strain Sensors and Stretchable Supercapacitors
Source: MDPI journal article supplement (doi:10.3390/s23042359), 2023-02-20
Supplement: s1 [file s1]

Supplementary Information

# Highly Elastically Deformable Coiled CNT/Polymer Fibers for Wearable Strain Sensors and Stretchable Supercapacitors

Jin Hyeong Choi <sup>1</sup>, Jun Ho Noh <sup>1,2</sup> and Changsoon Choi <sup>1,3,\*</sup>

<sup>1</sup> Department of Energy and Materials Engineering, Dongguk University, 30 Pildong-ro, 1-gil, Jung-gu, Seoul 04620, Republic of Korea; locomotive97@naver.com (J.H.C.); shwnsgh15@dongguk.edu (J.H.N.)

<sup>2</sup> Department of Advanced Battery Convergence Engineering, Dongguk University, 30 Pildong-ro, 1-gil, Jung-gu, Seoul 04620, Republic of Korea

<sup>3</sup> Research Center for Photoenergy Harvesting & Conversion Technology (phct), Dongguk University, 30 Pil-dong-ro, 1-gil, Jung-gu, Seoul 04620, Republic of Korea

\* Correspondence: cschoi84@dongguk.edu

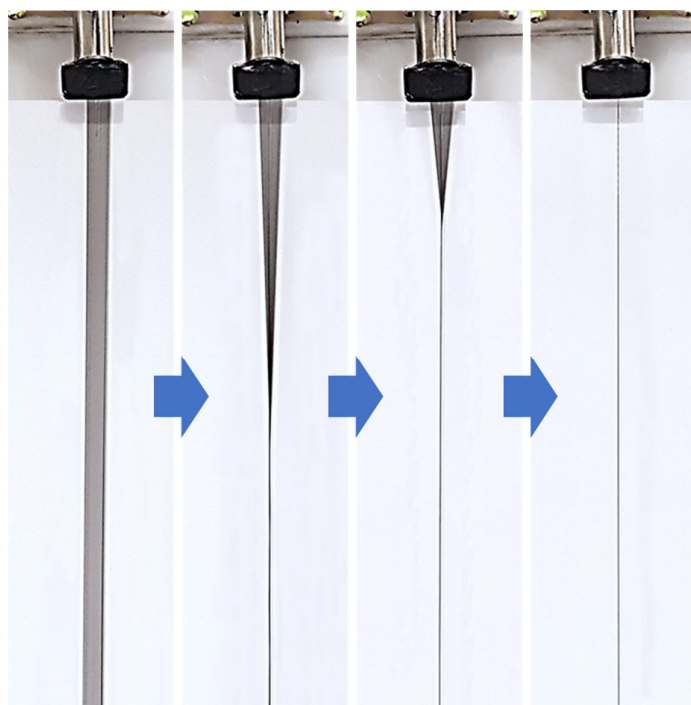

**Figure S1.** Photographs showing CNT sheets wrapping process on the polymer core substrate.

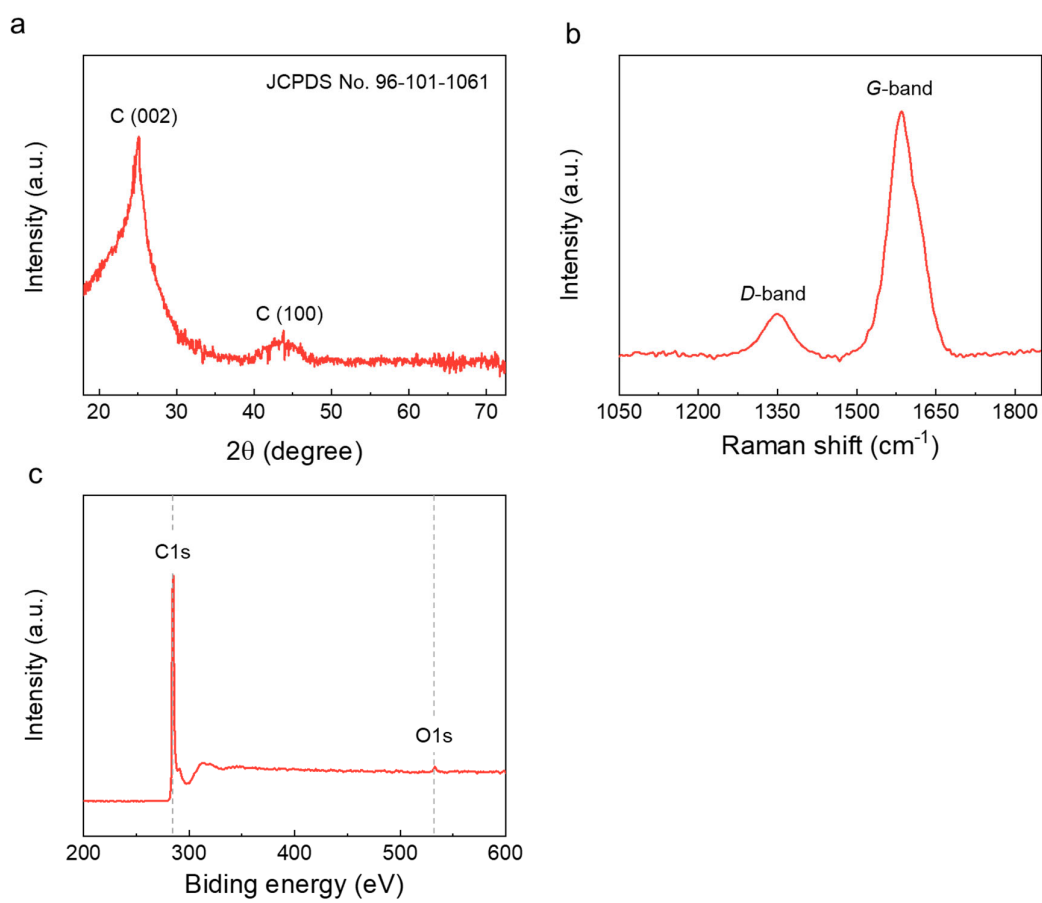

**Figure S2.** (a) XRD pattern, (b) Raman spectra, and (c) XPS spectra of the CNT sheets.

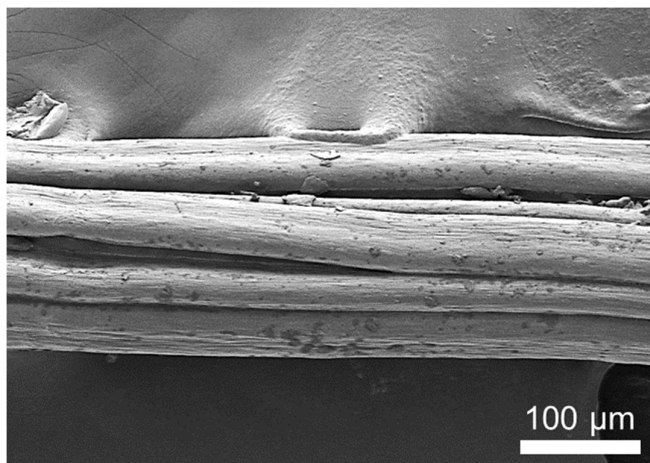

**Figure S3.** SEM image of the polymer (spandex) core substate.

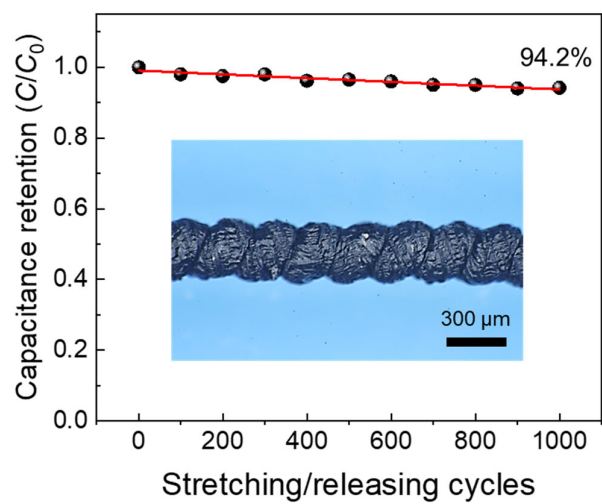

**Figure S4.** Capacitance retention versus stretching cycles (the inset shows an optical image of a coiled CNT/polymer fiber electrode without noticeable delamination even after immersion in an aqueous electrolyte).
